# Supplementary material
Source: PubMed Central journal article supplement (PMC3992250)
Supplement: NIHMS453588-supplement-Supplemental_Table_1.pdf [file NIHMS453588-supplement-Supplemental_Table_1.pdf]

**Supporting Table 1. Demographics, BMI, Blood Pressure, and Conscious Level at Study**

**Entry**

| <b>Race/Ethnicity<br/>- Gender</b>    | <b>Number<br/>in Group<br/>(%)</b> | <b>Age<br/>Years ± SD</b> | <b>BMI kg/m<sup>2</sup><br/>Median<br/>and IQR (n)</b> | <b>Systolic<br/>BP mm Hg<br/>Mean ± SD<br/>(n)</b> | <b>Diastolic<br/>BP mm Hg<br/>Mean ± SD<br/>(n)</b> | <b>Coma Grade<br/>Mean ± SD<br/>(n)</b> |
|---------------------------------------|------------------------------------|---------------------------|--------------------------------------------------------|----------------------------------------------------|-----------------------------------------------------|-----------------------------------------|
| <b>All Subjects</b>                   | 133<br>(100)                       | 43.8 ± 14.1               | 28.7<br>24.6-32.8 (101)                                | 126 ± 20 (133)                                     | 68 ± 14 (133)                                       | 2.2 ± 1.1 (132)                         |
| - <b>Women</b>                        | 94(70.7)                           | 44.7 ± 13.5               | 29.0<br>24.2-33.9 (67)                                 | 127 ± 21 (94)                                      | 68 ± 14 (94)                                        | 2.3 ± 1.1 (94)                          |
| - <b>Men</b>                          | 39 (29.3)                          | 41.7 ± 15.5               | 28.4<br>25.6-31.1 (34)                                 | 125 ± 20 (39)                                      | 67 ± 14 (39)                                        | 1.9 ± 1.9 (38)                          |
| <b>White</b>                          | 76 (57.1)                          | 45.4 ± 14.4               | 28.7<br>24.3-32.9 (57)                                 | 124 ± 21 (76)                                      | 66 ± 14 (76)                                        | 2.1 ± 1.0 (75)                          |
| - <b>Women</b>                        | 55 (72.3)                          | 46.1 ± 13.5               | 29.0<br>24.0-33.3 (39)                                 | 124 ± 21 (55)                                      | 66 ± 14 (55)                                        | 2.3 ± 1.1 (55)                          |
| - <b>Men</b>                          | 21 (27.6)                          | 43.6 ± 16.7               | 27.9<br>26.1-31.1 (18)                                 | 124 ± 22 (21)                                      | 65 ± 13 (21)                                        | 1.8 ± 0.8 (20)                          |
| <b>African-American</b>               | 21 (15.8)                          | 41.6 ± 13.3<br>(21)       | 32.5<br>26.2 -42.2 (15)                                | 135 ± 19 (21)                                      | 70 ± 16 (21)                                        | 2.3 ± 1.3 (21)                          |
| - <b>Women</b>                        | 15 (71.4)                          | 42.3 ± 14.1               | 34.3<br>26.0-47.0 (10)                                 | 137 ± 20 (15)                                      | 72 ± 13 (15)                                        | 2.5 ± 1.3 (15)                          |
| - <b>Men</b>                          | 6 (28.6)                           | (15)<br>39.8 ± 12.2 (6)   | 29.0<br>28.1-32.5 (5)                                  | 130 ± 17 (6)                                       | 64 ± 23 (6)                                         | 1.8 ± 1.2 (6)                           |
| <b>Hispanic</b>                       | 20 (15.0)                          | 39.1 ± 12.1<br>(20)       | 27.1<br>21.9-32.4 (13)                                 | 127 ± 18 (20)                                      | 71 ± 12 (20)                                        | 2.0 ± 1.0 (20)                          |
| - <b>Women</b>                        | 16 (80)                            | 41.6 ± 12.1               | 28.6<br>22.5-32.0 (10)                                 | 129 ± 18 (16)                                      | 71 ± 13 (16)                                        | 2.4 ± 1.2 (16)                          |
| - <b>Men</b>                          | 4 (20)                             | (16)<br>29.3 ± 6.2 (4)    | 25.3<br>22.4-28.9 (3)                                  | 119 ± 12 (4)                                       | 70 ± 7 (4)                                          | 2.0 ± 1.2 (4)                           |
| <b>Asian</b>                          | 9 (6.8)                            | 41.2 ± 16.6 (9)           | 24.8<br>23.1 – 26.9 (7)                                | 119 ± 24 (9)                                       | 65 ± 15 (9)                                         | 2.4 ± 1.0 (9)                           |
| - <b>Women</b>                        | 5 (56)                             | 42.6 ± 18.3 (5)           | 24.7<br>23.9 - 25.3 (4)                                | 113 ± 26 (5)                                       | 63 ± 15 (5)                                         | 2.4 ± 1.1 (5)                           |
| - <b>Men</b>                          | 4 (44)                             | 39.5 ± 16.7 (4)           | 23.9<br>23.9 - 28.3 (3)                                | 126 ± 23 (4)                                       | 68 ± 17 (4)                                         | 2.5 ± 1.0 (4)                           |
| <b>Native American</b>                | 3 (2.3)                            | 43.7 ± 18 (3)             | 29.8<br>25.2-41.1* (3)                                 | 132 ± 22 (3)                                       | 79 ± 3 (3)                                          | 2.3 ± 0.7 (6)                           |
| - <b>Women</b>                        | 0 (0)                              | -                         | -                                                      | -                                                  | -                                                   | -                                       |
| - <b>Men</b>                          | 3 (100)                            | 43.7 ± 18 (3)             | 29.8<br>25.2-41.1 (3)                                  | 132 ± 22 (3)                                       | 79 ± 3 (3)                                          | 2.3 ± 0.7 (6)                           |
| <b>Hawaiian/Pacific-<br/>Islander</b> | 1 (0.8)                            | 64                        | 30.0                                                   | 140 (1)                                            | 70 (1)                                              | 2 (1)                                   |
| - <b>Women</b>                        | 0 (0)                              | -                         | -                                                      | -                                                  | -                                                   | -                                       |
| - <b>Men</b>                          | 1 (100)                            | 64                        | 30.0                                                   | 140 (1)                                            | 70 (1)                                              | 2 (1)                                   |

|                |         |                 |                              |             |            |               |
|----------------|---------|-----------------|------------------------------|-------------|------------|---------------|
|                |         |                 |                              |             |            |               |
| <b>Other</b>   | 3 (2.3) | 51.7 ± 12.7 (3) | 29.0 (3)<br>28.3 – 39.0* (3) | 131 ± 4 (3) | 68 ± 6 (3) | 2.0 ± 1.4 (3) |
| - <b>Women</b> | 3 (100) | 51.7 ± 12.7 (3) | 29.0 (3)<br>28.3 - 39.0* (3) | 131 ± 4 (3) | 68 ± 6 (3) | 2.0 ± 1.4 (3) |
| - <b>Men</b>   | 0 (0)   | -               | -                            | -           | -          | -             |

Notes: (n) = Number of subjects per group (which may vary where data are missing)

BMI = Body Mass Index

BP = Blood pressure

SD = Standard deviation

IQR = Interquartile range

\*range for 3 subjects
