# Supplementary material
Source: PubMed Central journal article supplement (PMC3992250)
Supplement: NIHMS453588-supplement-Supplemental_Tables_2a_2b.pdf [file NIHMS453588-supplement-Supplemental_Tables_2a_2b.pdf]

**Supporting Table 2A. Key Laboratory Results At Study Entry: Liver Tests**

| <b>Race/Ethnicity<br/>- Gender</b> | <b>Bilirubin mg/dL<br/>Mean ± SD (n)</b> | <b>AST U/L<br/>Median and<br/>IQR (n)</b> | <b>ALT U/L<br/>Median and<br/>IQR (n)</b> | <b>ALKP U/L<br/>Median and<br/>IQR (n)</b> | <b>Albumin g/dL<br/>Median and<br/>IQR (n)</b> | <b>INR<br/>Median and<br/>IQR (n)</b> |
|------------------------------------|------------------------------------------|-------------------------------------------|-------------------------------------------|--------------------------------------------|------------------------------------------------|---------------------------------------|
| <b>Total Group</b>                 | 20.8 ± 11.5<br>(133)                     | 551<br>273-1127 (133)                     | 574<br>257-1423 (131)                     | 166<br>120-222 (128)                       | 2.4<br>2.1-2.7 (125)                           | 2.6<br>1.9-4.1 (130)                  |
| - <b>Women</b>                     |                                          | 643                                       | 681                                       | 166                                        | 2.5                                            | 2.7                                   |
| - <b>Men</b>                       | 20.1 ± 10.9 (94)                         | 291-1322 (94)                             | 264-1402 (94)                             | 128-225 (90)                               | 2.2-2.8 (88)                                   | 2.0-4.4 (91)                          |
|                                    | 22.6 ± 12.7 (39)                         | 432<br>210-1096 (39)                      | 392<br>225-1419 (37)                      | 155<br>112-216 (38)                        | 2.3<br>2.0-2.6 (37)                            | 2.3<br>1.8-3.6 (39)                   |
| <b>White</b>                       | 19.8± 12.9 (76)                          | 589<br>272-1370 (76)                      | 562<br>250-1522 (74)                      | 176<br>133-244 (73)                        | 2.5<br>2.2-2.9 (72)                            | 2.4<br>1.8-3.8 (75)                   |
| - <b>Women</b>                     | 19.6± 12.6 (55)                          | 644                                       | 758                                       | 171                                        | 2.5                                            | 3.0                                   |
| - <b>Men</b>                       | 20.2 ± 13.8 (21)                         | 288-1461 (55)<br>424<br>205 ± 1106 (21)   | 262-1603 (55)<br>323<br>199-915 (19)      | 133-236 (53)<br>192<br>147-266 (20)        | 2.2-2.8 (52)<br>2.4<br>2.3-3.1 (20)            | 1.9-4.1 (54)<br>1.9<br>1.7-2.5 (21)   |
| <b>African American</b>            | 23.4 ± 8.8 (21)                          | 623<br>390-1108 (21)                      | 571<br>275-1277 (21)                      | 156<br>122-222 (19)                        | 2.4<br>2.2-2.6 (19)                            | 2.6<br>2.3-4.3 (19)                   |
| - <b>Women</b>                     | 21.1 ± 5.3 (15)                          | 623                                       | 574                                       | 174                                        | 2.5                                            | 2.7                                   |
| - <b>Men</b>                       | 29.1 ± 13.3 (6)                          | 391-1200 (15)<br>550<br>246-1021 (6)      | 382-1283 (15)<br>300<br>257-696 (6)       | 147-226 (13)<br>121<br>105-141 (6)         | 2.3-2.8 (13)<br>2.2<br>2.1-2.4 (6)             | 2.3-5.0 (13)<br>2.5<br>1.9-2.8 (6)    |
| <b>Hispanic</b>                    | 19.4 ± 8.2 (20)                          | 657<br>341-393 (20)                       | 795<br>296-1302 (20)                      | 145<br>117-185 (20)                        | 2.4<br>2.1-2.7 (20)                            | 2.9<br>2.2-6.2 (20)                   |
| - <b>Women</b>                     | 18.7 ± 8.9 (16)                          | 657                                       | 681                                       | 145                                        | 2.5                                            | 2.7                                   |
| - <b>Men</b>                       | 22.1 ± 3.9 (4)                           | 337-986 (16)<br>728<br>459-973 (4)        | 296-1193 (16)<br>1214<br>666-1715 (4)     | 117-172 (16)<br>160<br>128-222 (4)         | 2.2-2.7 (16)<br>2.0<br>1.6-2.5 (4)             | 2.1-4.8 (16)<br>7.6<br>6.0-8.6 (4)    |
| <b>Asian</b>                       | 25.9± 11.2 (9)                           | 847<br>347 – 1153 (9)                     | 754<br>471-837 (9)                        | 119<br>110-216 (9)                         | 2.4<br>2.0-2.4 (7)                             | 2.3<br>1.9-4.6 (9)                    |
| - <b>Women</b>                     | 24.0± 12.6 (5)                           | 847                                       | 754                                       | 128                                        | 2.1                                            | 1.9                                   |
| - <b>Men</b>                       | 28.4 ± 10.6 (4)                          | 347-1012 (5)<br>452<br>383-1250 (4)       | 172-783 (5)<br>543<br>525-2979 (4)        | 119-220 (5)<br>110<br>110-143 (4)          | 1.7-2.6 (4)<br>2.3<br>2.3-2.4 (3)              | 1.9-2.3 (5)<br>3.1<br>2.8-6.5 (4)     |
| <b>Native American</b>             | 25.6 ± 9.4 (3)                           | 241<br>75-978* (3)                        | 392<br>169-1574* (3)                      | 109<br>85-170* (3)                         | 1.9<br>1.9-2.7* (3)                            | 3.9<br>2.9-5.4* (93)                  |
| - <b>Women</b>                     | -                                        | -                                         | -                                         | -                                          | -                                              | -                                     |
| - <b>Men</b>                       | 25.6 ± 9.4 (3)                           | 241<br>75-978* (3)                        | 392<br>169-1574* (3)                      | 109<br>85-170* (3)                         | 1.9<br>1.9-2.7* (3)                            | 3.9<br>2.9-5.4* (3)                   |
| <b>Hawaiian/Pacific Islander</b>   | 4.3 (1)                                  | 65 (1)                                    | 39 (1)                                    | 86 (1)                                     | 1.2 (1)                                        | 1.9 (1)                               |
| - <b>Women</b>                     | -                                        | -                                         | -                                         | -                                          | -                                              | -                                     |
| - <b>Men</b>                       | 4.3 (1)                                  | 65 (1)                                    | 39 (1)                                    | 86 (1)                                     | 1.2 (1)                                        | 1.9 (1)                               |

|                |                |             |              |              |              |              |
|----------------|----------------|-------------|--------------|--------------|--------------|--------------|
| <b>Other</b>   | 24.5 ± 4.0 (3) | 205         | 264          | 213          | 1.9          | 2.9          |
| - <b>Women</b> | 24.5 ± 4.0 (3) | 75-671* (3) | 127-269* (3) | 164-243* (3) | 1.8-2.1* (3) | 2.0-5.5* (3) |
| - <b>Men</b>   | -              | 205 (3)     | 264 (3)      | 213          | 1.9          | 2.9          |
|                |                | 75-671* (3) | 127-269* (3) | 164-243* (3) | 1.8-2.1* (3) | 2.0-5.5* (3) |
|                |                | -           | -            | -            | -            | -            |

AST = aspartate aminotransferase

ALT = alanine aminotransferase

ALKP = alkaline phosphatase

INR = international normal rate

SD = Standard deviation

IQR = Interquartile range, \*range for 3 subjects

**Supporting Table 2B. Key Laboratory Results At Study Entry: Hemograms and Creatinine**

| Race/Ethnicity<br>- Gender | Hb g/dL         | WBC 10 <sup>6</sup> /μL | Platelets 10 <sup>6</sup> /μL | Creatinine mg/dL                    |
|----------------------------|-----------------|-------------------------|-------------------------------|-------------------------------------|
|                            | Mean ± SD       | Mean ± SD               | Mean ± SD                     | Median and IQR (n)                  |
| <b>Total Group</b>         | 11.5± 2.6 (132) | 13.5 ± 7.4 (132)        | 168 ± 91<br>(132)             | 1.2<br>0.8-2.8 (133)                |
| - <b>Women</b>             | 11.2± 2.4 (93)  | 14.0± 7.6 (93)          |                               | 1.1                                 |
| - <b>Men</b>               | 12.3 ± 2.9 (39) | 12.3 ± 7.0 (39)         | 178 ± 92 (93)                 | 0.7-2.2 (94)                        |
|                            |                 |                         | 143 ± 82 (39)                 | 1.9<br>0.9-3.6 (39)                 |
| <b>White</b>               | 11.7± 2.1 (75)  | 12.6 ± 7.5 (75)         | 162 ± 91 (75)                 | 1.6<br>0.8-3.3 (76)                 |
| - <b>Women</b>             | 11.6± 1.9 (54)  | 13.1 ± 7.1 (54)         | 175 ± 84 (54)                 | 1.3                                 |
| - <b>Men</b>               | 11.9 ± 2.5 (21) | 11.4 ± 8.4 (21)         | 131 ± 100 (21)                | 0.7-2.8 (55)<br>3.2<br>0.9-3.7 (21) |
| <b>African American</b>    | 10.4 ± 3.3 (21) | 14.1 ± 5.9 (21)         | 187 ± 112 (21)                | 1.2<br>0.9-2.7 (21)                 |
| - <b>Women</b>             | 10.4 ± 3.6 (15) | 14.9 ± 6.4 (15)         | 208 ± 124 (15)                | 1.1<br>0.8- 2.1 (15)                |
| - <b>Men</b>               | 10.2 ± 2.5 (6)  | 12.2 ± 4.2 (6)          | 132 ± 40 (6)                  | 4.1<br>1.6 – 5.6 (6)                |
| <b>Hispanic</b>            | 11.4 ± 2.7 (20) | 16.1 ± 9.1 (20)         | 186 ± 84 (20)                 | 1.0<br>0.8-1.1 (20)                 |
| - <b>Women</b>             | 11.0 ± 2.6 (16) | 16.1 ± 9.6 (16)         | 197 ± 87 (16)                 | 1.0                                 |
| - <b>Men</b>               | 13.2 ± 2.6 (4)  | 16.0 ± 7.9 (4)          | 146 ± 65 (4)                  | 0.8-1.1 (16)<br>1.1<br>0.9-1.8 (4)  |
| <b>Asian</b>               | 12.6 ± 3.6 (10) | 14.2 ± 7.2 (10)         | 125 ± 53 (10)                 | 1.7<br>0.8-2.5 (10)                 |
| - <b>Women</b>             | 14.8 ± 5.0 (6)  | 13.3 ± 8.9 (6)          | 95 ± 28 (6)                   | 2.0<br>1.1-3.2 (6)                  |
| - <b>Men</b>               | 11.2 ± 1.2 (4)  | 15.5 ± 4.3 (4)          | 170 ± 52 (4)                  | 1.0<br>0.7-2.0 (4)                  |
| <b>Native American</b>     | 13.0 ± 1.9 (3)  | 11.8 ± 2.4 (3)          | 201 ± 72 (3)                  | 0.8<br>0.8-1.1 (3)                  |
| - <b>Women</b>             | -               | -                       | -                             | -                                   |
| - <b>Men</b>               | 13.0 ± 1.9 (3)  | 11.8 ± 2.4 (3)          | 201 ± 72 (3)                  | 0.8<br>0.8-1.1 (3)                  |

|                                  |                |                |               |               |
|----------------------------------|----------------|----------------|---------------|---------------|
| <b>Hawaiian/Pacific Islander</b> | 15.3 (1)       | 7.5 (1)        | 164 (1)       | 0.9 (1)       |
| - <b>Women</b>                   | -              | -              | -             | -             |
| - <b>Men</b>                     | 15.3 (1)       | 7.5 (1)        | 164 (1)       | 0.9 (1)       |
| <b>Other</b>                     | 10.5 ± 2.3 (3) | 13.3 ± 1.7 (3) | 114 ± 108 (3) | 1.5           |
| - <b>Women</b>                   | 10.5 ± 2.3 (3) | 13.3 ± 1.7 (3) | 114 ± 108 (3) | 0.9-1.5 * (3) |
| - <b>Men</b>                     | -              | -              | -             | 1.5           |
|                                  |                |                |               | 0.9-1.5* (3)  |
|                                  |                |                |               | -             |

Hb = Hemoglobin

WBC = White blood cell count

SD = Standard deviation

IQR = Interquartile range, \*range for 3 subjects
